## CORRECTION

# Correction: Differential regulation of *Pleurotus ostreatus* dye peroxidases gene expression in response to dyes and potential application of recombinant *Pleos-DyP1* in decolorization

The PLOS ONE Staff

The Funding section is incorrect. The complete, correct funding information is: “This work was supported by the Instituto Politécnico Nacional (IPN) Project No. SIP 20181110 ([www.ipn.mx](http://www.ipn.mx)) and Comisión de Operación y Fomento de Actividades Académicas (COFAA-IPN) (<https://www.cofaa.ipn.mx>) which are gratefully acknowledged. JC-F was a postgraduate fellow with a CONACYT fellowship No. 589318 (<http://www.conacyt.gob.mx>).” The publisher apologizes for the error.

## Reference

1. Cuamatzi-Flores J, Esquivel-Naranjo E, Nava-Galicia S, López-Munguía A, Arroyo-Becerra A, Villalobos-López MA, et al. (2019) Differential regulation of *Pleurotus ostreatus* dye peroxidases gene expression in response to dyes and potential application of recombinant *Pleos-DyP1* in decolorization. PLoS ONE 14(1): e0209711. <https://doi.org/10.1371/journal.pone.0209711> PMID: 30608975

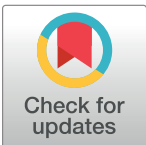

## OPEN ACCESS

**Citation:** The PLOS ONE Staff (2019) Correction: Differential regulation of *Pleurotus ostreatus* dye peroxidases gene expression in response to dyes and potential application of recombinant *Pleos-DyP1* in decolorization. PLoS ONE 14(3): e0213798. <https://doi.org/10.1371/journal.pone.0213798>

**Published:** March 7, 2019

**Copyright:** © 2019 The PLOS ONE Staff. This is an open access article distributed under the terms of the [Creative Commons Attribution License](https://creativecommons.org/licenses/by/4.0/), which permits unrestricted use, distribution, and reproduction in any medium, provided the original author and source are credited.
